# Supplementary material for: EEG dynamics in children from preanesthetic awake state, under general anaesthesia until regain of consciousness
Source: Research Square preprint supplement (doi:10.21203/rs.3.rs-6696965/v1), 2025-06-25
Supplement: Supplementary file 1 [file de4d2ec4ede8d33a91f0f6a4.docx]

**Title: EEG dynamics in children from preanesthetic awake state, under general anaesthesia until regain of consciousness**

Maximilian Markus1, Feidias Panagiotou 1, Claudia Spies1, Susanne Koch 1

1Department of Anaesthesiology and Intensive Care Medicine (CCM, CVK), Charité – Universitätsmedizin Berlin, corporate member of Freie Universität Berlin and Humboldt-Universität zu Berlin

**Correspondence to:**

Dr. med. Maximilian Markus

Maximilian.markus@charite.de
Klinik für Anästhesiologie und Intensivmedizin
Charité - Universitätsmedizin Berlin
Campus Virchow-Klinikum
Augustenburger Platz 1
13353 Berlin

Germany

Content

[I. Frequency Analysis 3](#_Toc196922426)

# Frequency Analysis

| Suppl Table 1 | | Detailed Analysis of the frequency band analysis at each time point | | | | |
| --- | --- | --- | --- | --- | --- | --- |
|  |  | |  |  |  |  |
|  | 0–5 Months | | 6–11 Months | 12–23 Months | >24 Months | P Values |
| Baseline | | | | | | |
| Total Power | 1312  (409; 2215) | | 3442  (2102; 4782) | 4557  (3308; 5805) | 5286  (4330; 6243) | 0,002 |
| Beta | 49,95  (-30; 130) | | 31  (12; 49) | 59  (33; 85) | 44  (36; 52) | 0,177 |
| Alpha | 16  (1; 30) | | 23  (14; 31) | 31  (23; 40) | 31  (27; 35) | 0,034 |
| Theta | 70  (21; 118) | | 150  (98; 201) | 229  (147; 311) | 232  (194; 269) | 0,001 |
| Delta | 11815  (347; 2016) | | 3238  (1954; 4522) | 4236  (3042; 5430) | 4978  (4039; 5917) | 0,002 |
| Loss of Consciousness | | | | | | |
| Totale Power | 4406  (-3968; 12782) | | 6832  (2806; 10858) | 6392  (4134; 8651) | 11111  (9357; 12864) | 0,001 |
| Beta | 31  (-1; 65) | | 103  (67; 139) | 106  (74; 138) | 95  (71; 118) | 0,019 |
| Alpha | 30  (-5; 67) | | 187  (108; 265) | 194  (139; 250) | 216  (151; 281) | 0,004 |
| Theta | 109  (9; 208) | | 418  (254; 582) | 338  (216; 460) | 331  (257; 406) | 0,019 |
| Delta | 4239  (-4134; 12614) | | 6123  (2183; 10062) | 5752  (3490; 8014) | 10467  (8711; 12223) | 0,001 |
| Intraoperative | | | | | | |
| Totale Power | 501  (199; 802) | | 1404  (969; 1839) | 2194  (1601; 2786) | 4230  (3560; 4900) | 0,001 |
| Beta | 19  (-5; 44) | | 113  (77; 149) | 148  (113; 182) | 196  (166; 225) | 0,001 |
| Alpha | 27  (6; 48) | | 228  (142; 315) | 310  (223; 397) | 534  (453; 615) | 0,001 |
| Theta | 44  (18; 71) | | 188  (113; 263) | 253  (180; 325) | 400  (303; 497) | 0,001 |
| Delta | 410  (121; 698) | | 873  (587; 1159) | 1482  (922; 2041) | 3141  (2541; 3741) | 0,001 |
| Return of Consciousness | | | | | | |
| Totale Power | 348  (-18; 715) | | 1168  (-147; 2484) | 2175  (1105; 3245) | 1993  (1184; 2802) | 0,039 |
| Beta | 57  (-74; 189) | | 31  (1; 61) | 28  (17; 40) | 64  (44; 84) | 0,004 |
| Alpha | 7  (-6; 20) | | 12  (1; 23) | 20  (6; 33) | 18  (14; 22) | 0,005 |
| Theta | 11  (4; 19) | | 36  (7; 65) | 75  (43; 107) | 58  (32; 84) | 0,002 |
| Delta | 271  (23; 520) | | 1087  (-207; 2382) | 2051  (1006; 3096) | 1851  (1060; 2642) | 0,07 |

Data presented as mean µV² + (95% CI)
